# Supplementary material for: Luteolin inhibits H2O2-induced cellular senescence via modulation of SIRT1 and p53
Source: PubMed Central journal article supplement — Korean J Physiol Pharmacol. 2021 Jul 1;25(4):297–305. doi: 10.4196/kjpp.2021.25.4.297 (PMC8255127; doi:10.4196/kjpp.2021.25.4.297), 2021-07-01
Supplement: kjpp-25-4-297-supple.pdf [file kjpp-25-4-297-supple.pdf]

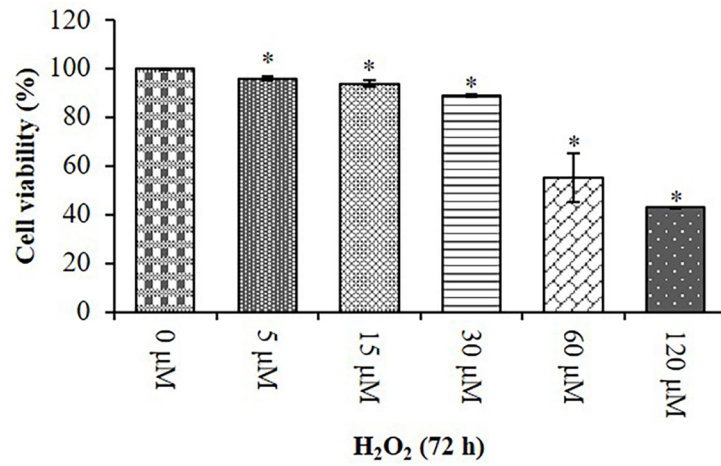

**Supplementary Fig. 1. Related to Fig. 1. Effects of hydrogen peroxide (H<sub>2</sub>O<sub>2</sub>) on cell viability.** House Ear Institute-Organ of Corti 1 (HEI-OC1) cells were incubated for 72 h with various concentrations of H<sub>2</sub>O<sub>2</sub> (0–120 μM). There was significant difference when the cells were treated with 30 μM H<sub>2</sub>O<sub>2</sub>. \*p < 0.05 vs. control.
